# Supplementary material
Source: PubMed Central journal article supplement (PMC3983013)
Supplement: ac404006z_si_001.pdf [file ac404006z_si_001.pdf]

## Supplementary Information

### Label Free Absolute Quantitation of Oligosaccharides using Multiple Reaction Monitoring

Qiuting Hong,<sup>a</sup> L. Renee Ruhaak,<sup>a</sup> Sarah M. Totten,<sup>a</sup> Jennifer T. Smilowitz,<sup>b,c</sup> J. Bruce German,<sup>b,c</sup> Carlito

B. Lebrilla<sup>a,b,\*</sup>

<sup>a</sup>Department of Chemistry, University of California, Davis, California, 95616, United States

<sup>b</sup>Foods for Health Institute, University of California, Davis, California, 95616, United States

<sup>c</sup>Department of Food Science and Technology, University of California, Davis, California, 95616,  
United States

---

\*To whom correspondence should be addressed

Carlito B. Lebrilla  
One Shields Avenue  
Davis, CA 95616, USA  
Tel.: +1-530-752-5504  
Fax: +1-530-752-8995  
E-mail: [cblebrilla@ucdavis.edu](mailto:cblebrilla@ucdavis.edu)

### Table of Content

| Content                                                          | Page |
|------------------------------------------------------------------|------|
| Experimental procedures.....                                     | S-2  |
| Table S-1: Dynamic MRM transition list.....                      | S-4  |
| Figure S-1: Representative HMO tandem spectra.....               | S-5  |
| Figure S-2: Individual extract ion chromatograms.....            | S-6  |
| Figure S-3: Standard calibration curves for 7 HMO standards..... | S-12 |
| Figure S-4: Calibration curve of LNFP-I.....                     | S-13 |
| Reference.....                                                   | S-13 |

## EXPERIMENTAL PROCEDURES

*Samples and Materials.* Lacto-N-tetraose (LNT), lacto-N-fucopentaose I (LNFP-I), sialyllacto-N-tetraose c (LSTc), 3'-sialyllactose (3'-SL) and 6'-sialyllactose (6'-SL) standards were purchased from Carbosynth Limited (Berkshire, UK). 2'-fucosyllactose (2'-FL) and lacto-N-hexaose (LNH) standards were purchased from Sigma-Aldrich (St. Louis, MO, USA). Sodium borohydride ( $\text{NaBH}_4$ , 98%) and formic acid were purchased from Sigma-Aldrich (St. Louis, MO, USA). Graphitized carbon cartridges (GCC, 150 mg bed weight, 4 mL cartridge volume) were purchased from Grace (Deerfield, IL, USA). Milk samples were obtained from twenty healthy women who gave birth to healthy full term infants enrolled in the UC Davis Foods for Health Institute Lactation Study. Participants were instructed to write on all sample tubes the time, and date of collection. Milk samples were collected in the morning on day 35 postpartum (except for milk from mother ID #1038, which was collected on day 28) using a modified published method<sup>1</sup> involving milk collection from one breast using a Harmony manual breast pump (Medela Inc., McHenry, IL) by the participant 2–4 h after feeding her infant. Participants fully pumped one breast into a bottle, inverted 6 times, transferred 12 mL into a 15 mL polypropylene tube, and subsequently froze the sample in the kitchen freezer ( $-20\text{ }^\circ\text{C}$ ). Samples were picked up from the participants' homes on a biweekly basis, transported to the lab on dry ice, and stored at  $-80\text{ }^\circ\text{C}$  until processing. The participants' secretor status was determined by measuring specific fucosylated HMO structures in their milk as previously described.<sup>2</sup> Ten secretor and ten nonsecretor participants were chosen for this study. The UC Davis Institutional Review Board approved all aspects of the study and informed consent was obtained from all subjects. This trial was registered on clinicaltrials.gov (ClinicalTrials.gov Identifier: NCT01817127).

*Standard Calibration and Standard Addition Curves.* A serial dilution was performed for the HMO standards to create the standard calibration curve for absolute quantitation. The concentrations studied

are from 0.833  $\mu\text{g/mL}$  to  $1.67 \times 10^2 \mu\text{g/mL}$  for 2'-FL, LNT, LNFP-I, from 0.833  $\mu\text{g/mL}$  to 83.3  $\mu\text{g/mL}$  for 3'-SL, 6'-SL and LSTc, and from 0.500  $\mu\text{g/mL}$  to  $1.00 \times 10^2 \mu\text{g/mL}$  for LNH.

A standard addition experiment was performed for one of the milk samples (mother ID# 1035). Briefly, varying amount of HMO standards were added into the 20x diluted extracted milk oligosaccharide sample to create a standard addition calibration curve. Three concentration levels were performed besides the non-spiked sample. They are 20.8, 31.3 and 41.7  $\mu\text{g/mL}$  for 2'-FL, 5.00, 10.4 and 15.6  $\mu\text{g/mL}$  for LNT, 4.17, 6.25 and 8.33  $\mu\text{g/mL}$  for LNFP-I, 0.500, 1.00 and 2.00  $\mu\text{g/mL}$  for LNH, 2.08, 4.17 and 6.25  $\mu\text{g/mL}$  for 6'-SL, 3.13, 5.00, and 6.25  $\mu\text{g/mL}$  for 3'-SL, 1.04, 1.56 and 2.08  $\mu\text{g/mL}$  for LSTc. These specific concentrations were chosen so that their MRM responses were within 3 times of the non-spiked sample.

LC Gradients. The LC separations were performed using a binary gradient at 0.2 mL/min flow rate: solvent A of 3% acetonitrile, 0.1% formic acid; solvent B of 90% acetonitrile, 0.1% formic acid in nano pure water (v/v). The 55-min gradient was programmed as follows: 0–20 min, 0–16% B; 20–30 min, 16–44% B; 30–35 min, 44–100% B; 35–40 min, 100% B; 40–41 min, 100–0%; 41–45 min, 0% B. The 10-min gradient used in instrument optimization was programmed as follows: 0–2 min, 5–40% B; 2–3 min, 40–100% B; 3–5 min, 100% B; 5–7 min, 100–5% B; 7–10 min, 5% B.

Data Analysis. MRM signal (peak area) was extracted and a linear regression was performed to examine the correlation between the MRM response ( $y$ , ion counts) and the HMO concentration ( $x$ ,  $\mu\text{g/mL}$ ) using Agilent MassHunter Quantitative B.05.02. The closeness of the fit was evaluated by the coefficient of determination,  $R^2$ . HMO identifications were performed based on the retention time and ion abundances.

Table S-1. Dynamic MRM transition list

| Composition <sup>a</sup><br>(Hex:HexNAc:Fuc:Neu5Ac) | mass<br>(Da) | Precursor Ion<br>(m/z) | Product Ion <sup>b</sup><br>(m/z) | Isomers      | Retention time <sup>c</sup><br>(min) | Collision Energy<br>(eV) |
|-----------------------------------------------------|--------------|------------------------|-----------------------------------|--------------|--------------------------------------|--------------------------|
| 2010                                                | 490.19       | 491.2                  | 345.2, 183.1                      | 2'-FL        | 13.8±1.4                             | 6                        |
|                                                     |              |                        |                                   | 3'-FL        | 2.0±3.0                              | 6                        |
| 3000                                                | 506.18       | 507.3                  | 345.2, 183.1                      | 3000 a       | 11.7±1.4                             | 10                       |
|                                                     |              |                        |                                   | 3000 b       | 12.1±1.4                             | 10                       |
|                                                     |              |                        |                                   | 3000 c       | 15.8±1.4                             | 10                       |
| 2001                                                | 635.23       | 636.3                  | 292.1, 454.3                      | 6'-SL        | 17.5±4.0                             | 12                       |
|                                                     |              |                        |                                   | 3'-SL        | 26.9±4.0                             | 12                       |
| 2020                                                | 636.25       | 637.3                  | 491.2, 183.1                      | LDFT         | 15.9±1.5                             | 6                        |
| 1101                                                | 676.25       | 677.3                  | 386.2, 224.1                      | 6'-SLN       | 17.5±4.0                             | 10                       |
|                                                     |              |                        |                                   | 3'-SLN       | 27.5±4.0                             | 10                       |
| 3100                                                | 709.26       | 710.3                  | 366.2, 204.1                      | LNT, LNnT    | 15.6±1.8                             | 15                       |
| 3110                                                | 855.32       | 856.3                  | 512.2, 366.2                      | LNFP-I       | 14.9±1.5                             | 10                       |
|                                                     |              |                        |                                   | LNFP-II      | 11.7±1.5                             | 10                       |
|                                                     |              |                        |                                   | LNFP-V       | 16.0±1.5                             | 10                       |
| 3101                                                | 1000.36      | 1001.4                 | 657.1, 292.1                      | LST a, b, c  | 26.5±7.0                             | 15                       |
| 3120                                                | 1001.38      | 501.7                  | 512.2, 204.1                      | LNDFH I, II  | 11.5±2.2                             | 10                       |
| 4200                                                | 1074.40      | 538.4                  | 366.2, 204.1                      | LNH, LNnH    | 18.8±2.2                             | 12                       |
| 3111                                                | 1146.42      | 574.2                  | 366.2, 292.1                      | 3111         | 24.0±6.0                             | 15                       |
| 3220                                                | 1204.46      | 603.2                  | 512.2, 366.2                      | 3220         | 11.7±1.5                             | 15                       |
| 4210                                                | 1220.45      | 611.2                  | 512.2, 366.2                      | MFLNH, IFLNH | 18.0±3.0                             | 15                       |
| 4300                                                | 1277.4       | 639.8                  | 204.1, 366.2                      | 4300         | 17.7±2.0                             | 20                       |
| 4201                                                | 1365.49      | 683.8                  | 366.2, 292.1                      | 4201         | 27.0±7.0                             | 15                       |
| 4220                                                | 1366.51      | 684.3                  | 512.2, 366.2                      | DFLNH b      | 14.4±1.5                             | 20                       |
|                                                     |              |                        |                                   | DFLNH a      | 16.0±1.5                             | 20                       |
|                                                     |              |                        |                                   | DFLNH c      | 20.3±1.5                             | 20                       |
| 4211                                                | 1511.55      | 756.8                  | 366.2, 292.1                      | 4211         | 25.8±8.5                             | 15                       |
| 4230                                                | 1512.57      | 757.3                  | 512.2, 366.2                      | TFLNH        | 14.4±1.5                             | 10                       |
|                                                     |              |                        |                                   | 4230         | 19.8±1.5                             | 10                       |
| 5310                                                | 1585.59      | 793.8                  | 512.2, 366.2                      | 5310         | 20.0±6.0                             | 22                       |
| 4221                                                | 1657.61      | 829.8                  | 366.2, 292.1                      | 4221         | 26.0±8.0                             | 15                       |
| 5301                                                | 1730.62      | 866.3                  | 366.2, 292.1                      | 5301         | 27.0±6.0                             | 25                       |
| 5320                                                | 1731.64      | 866.8                  | 512.2, 366.2                      | 5320         | 19.5±6.0                             | 25                       |
| 5311                                                | 1876.68      | 939.3                  | 366.2, 292.1                      | 5311         | 26.5±7.0                             | 25                       |
| 5330                                                | 1877.70      | 939.9                  | 512.2, 366.2                      | 5330         | 16.0±5.0                             | 25                       |
| 6410                                                | 1950.72      | 976.4                  | 512.2, 366.2                      | 6410         | 22.8±4.0                             | 30                       |
| 5321                                                | 2022.74      | 1012.4                 | 366.2, 292.1                      | 5321         | 25.5±7.5                             | 15                       |
| 5340                                                | 2023.76      | 1012.9                 | 512.2, 366.2                      | 5340         | 18.1±2.0                             | 25                       |
| 6401                                                | 2095.76      | 1048.9                 | 366.2, 292.1                      | 6401         | 27.2±5.0                             | 25                       |
| 6420                                                | 2096.78      | 1049.4                 | 512.2, 366.2                      | 6420         | 22.5±5.0                             | 25                       |
| 5331                                                | 2168.80      | 1085.4                 | 366.2, 292.1                      | 5331         | 25.0±8.0                             | 25                       |
| 6430                                                | 2242.83      | 748.6                  | 512.2, 366.2                      | 6430         | 21.0±4.0                             | 20                       |
| 6440                                                | 2388.89      | 1195.5                 | 512.2, 366.2                      | 6440         | 19.3±1.5                             | 25                       |

- Monosaccharide composition 5Hex:3HexNAc:2Fuc:1Neu5Ac represented as 5321. Hex: hexose, HexNAc: N-acetylhexosamine; Fuc: fucose, Neu5Ac: N-acetylneuraminic acid.
- Product ions were monitored for the same compound.
- Compounds with isomers were monitored either in several different time windows or in one extended time window.

Figure S-1

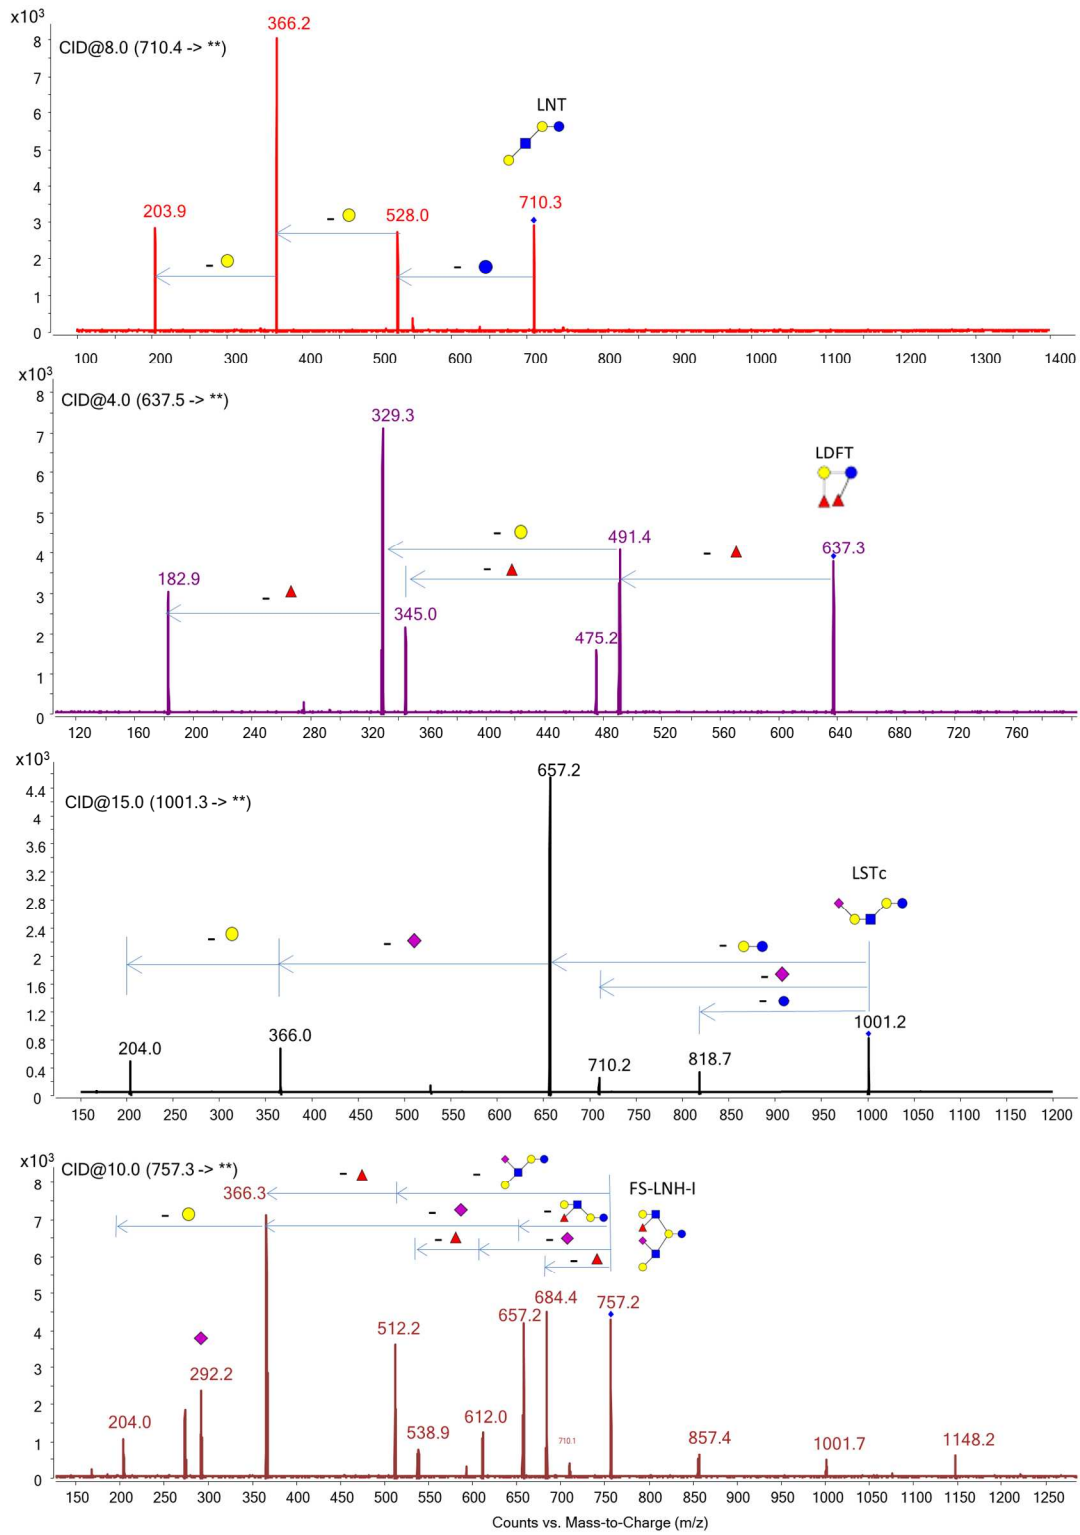

Figure S-1: HMO fragmentation patterns using collision-induced dissociation in a quadrupole show some common carbohydrate fragment ions such as  $m/z$  366.2 (GlcNAc-Gal), 204.1 (GlcNAc), 183.1 (Glc,

reducing end), 512.2 (Fuc–GlcNAc–Gal), 292.1 (Neu5Ac), and 657.1 (Neu5Ac–GlcNAc–Gal). (●) Glc (●) Gal (■) GlcNAc (■) GalNAc (▲) Fuc (◆) Neu5Ac

Figure S-2

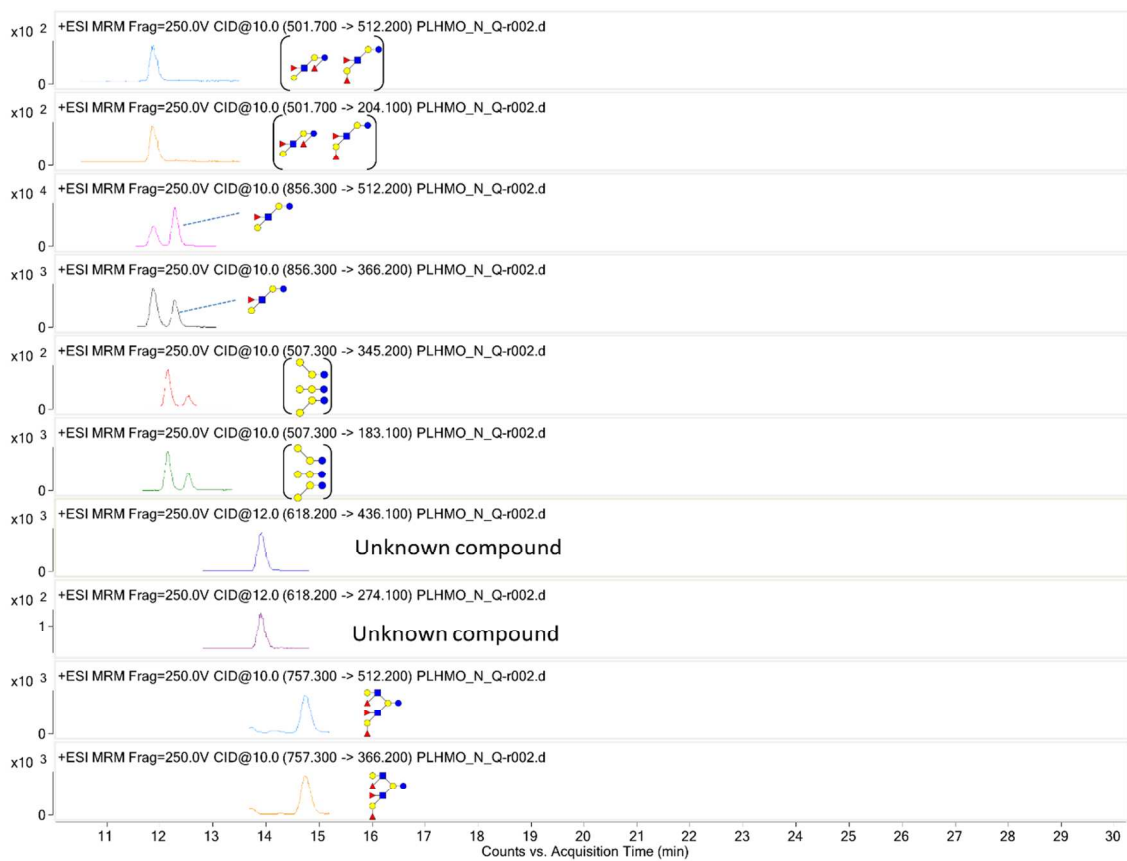

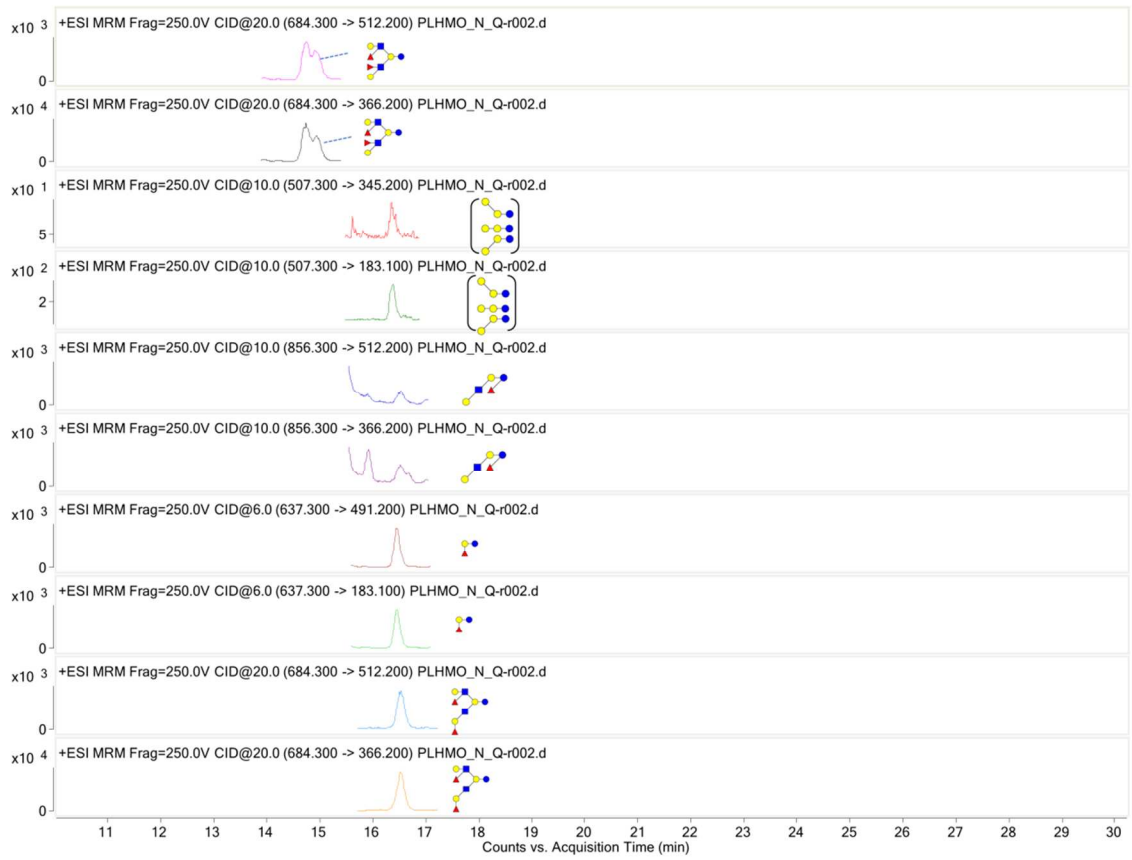

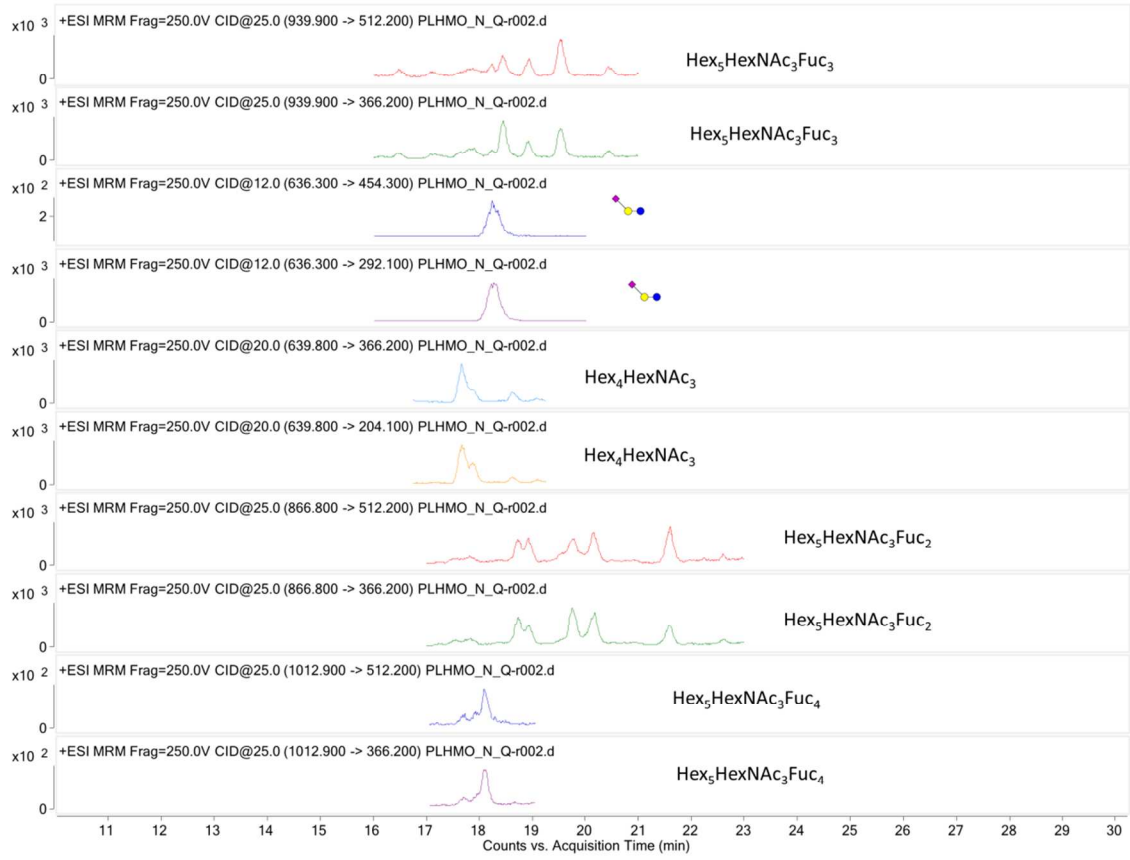



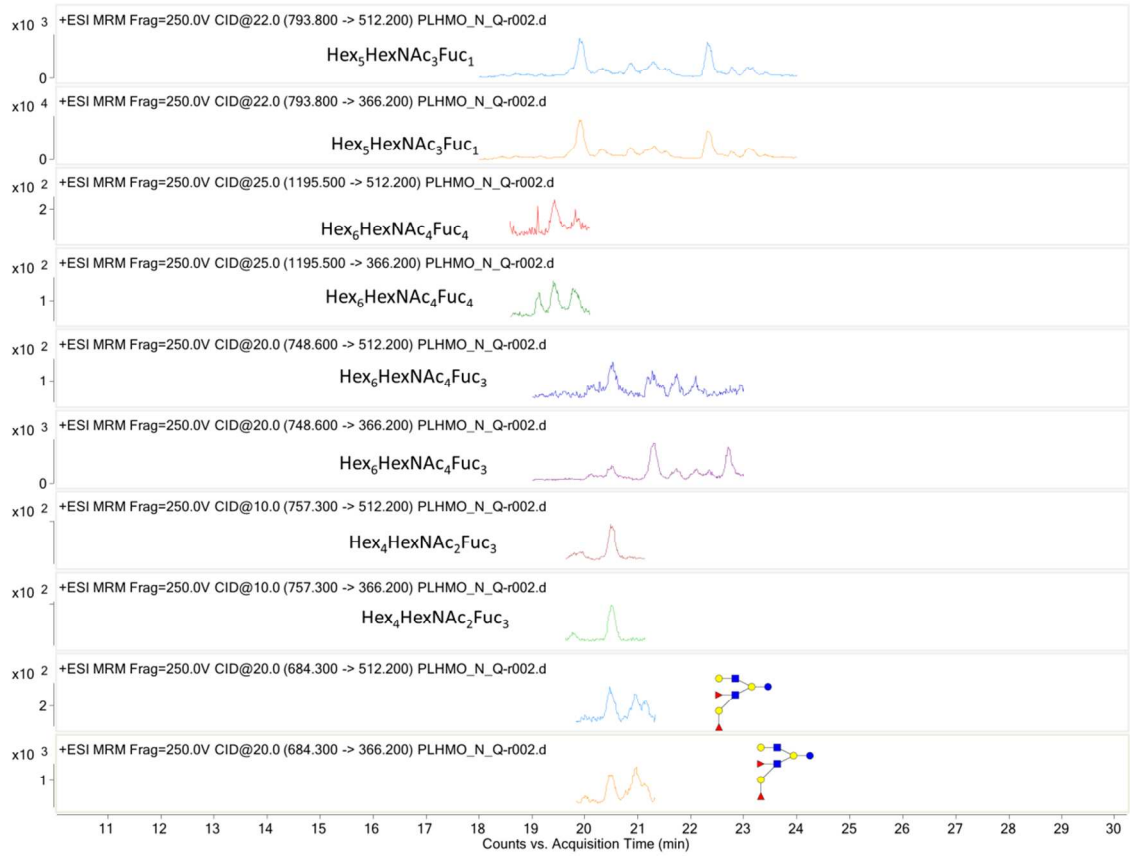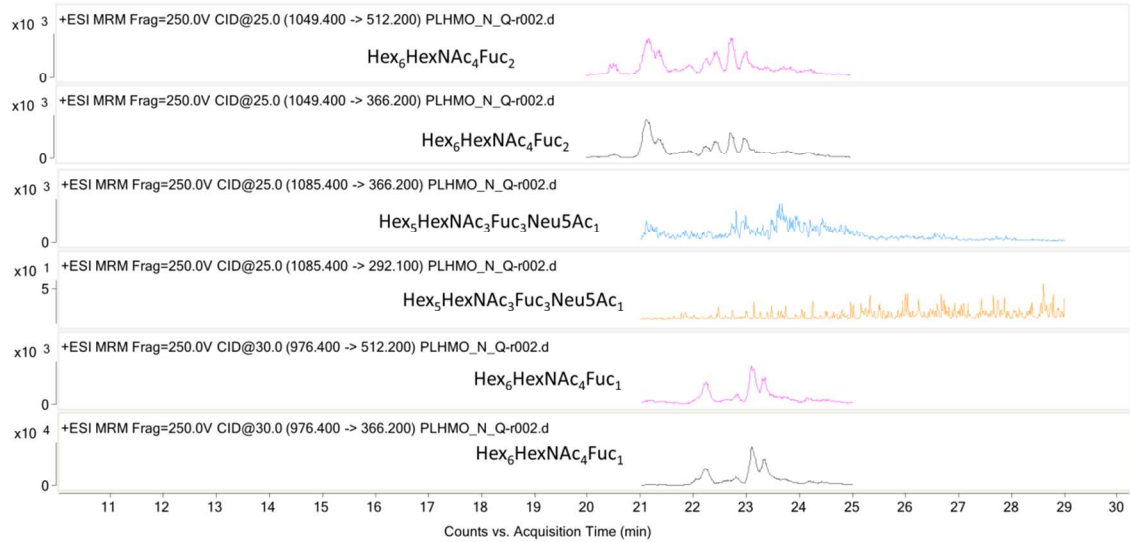

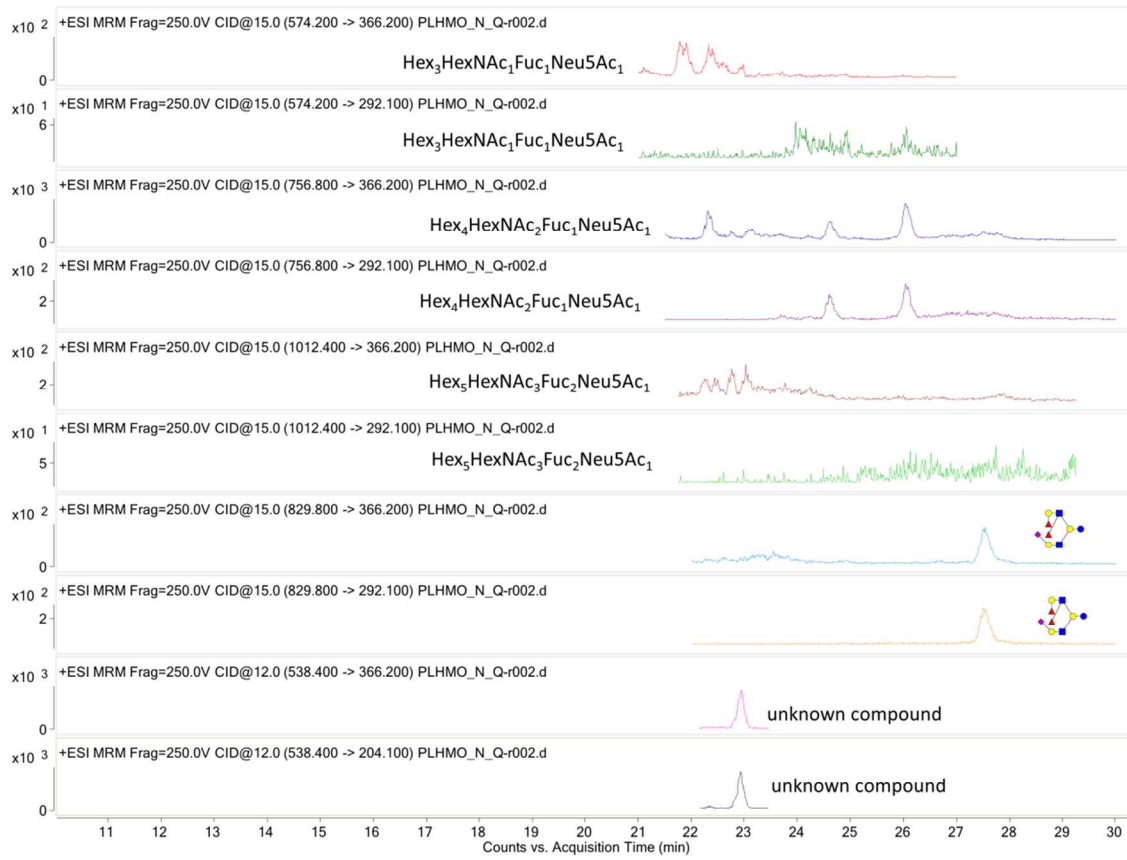

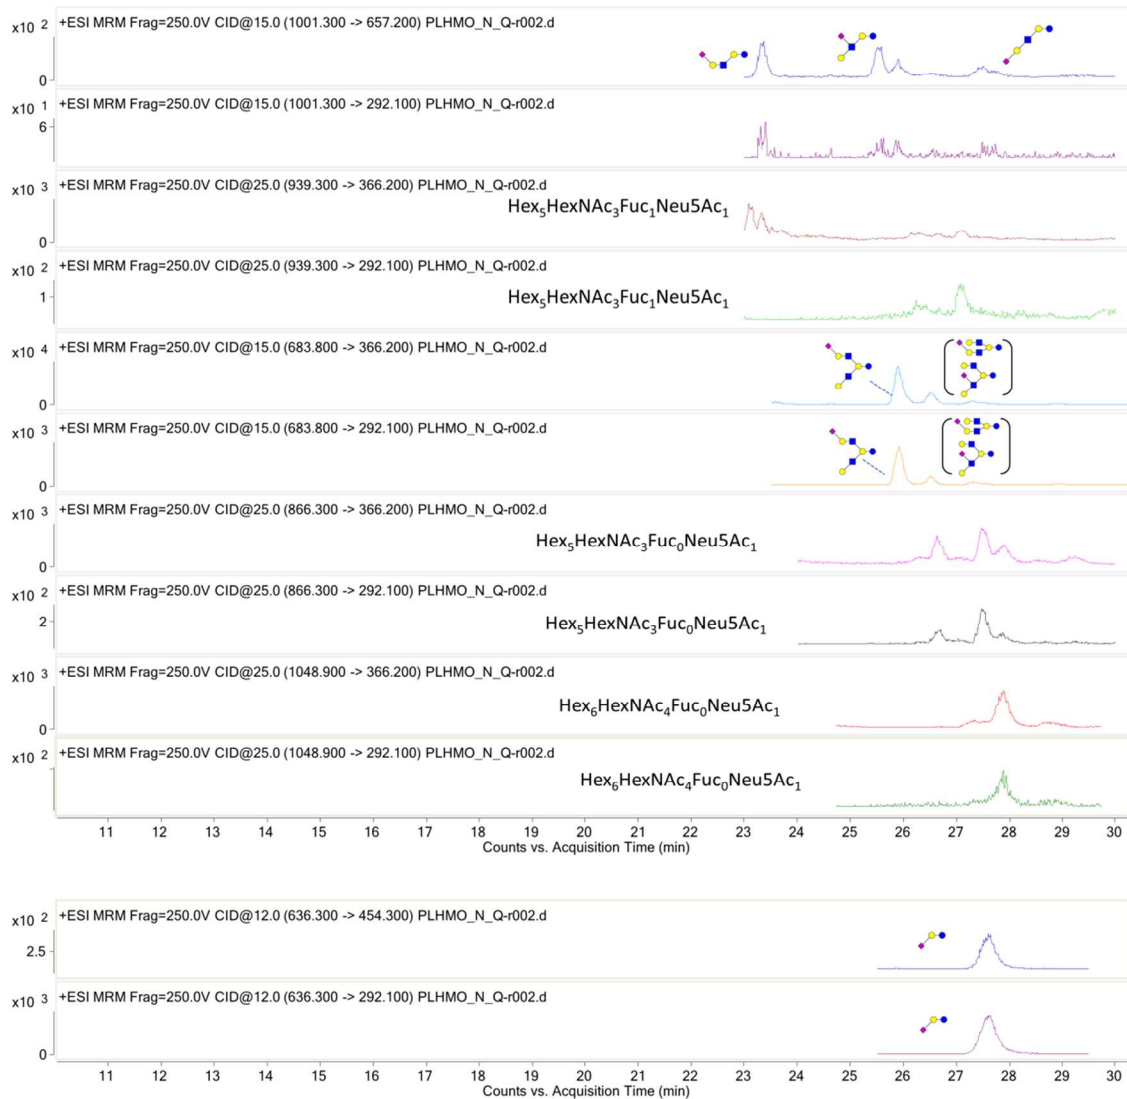

**Figure S-2:** Individual extract ion chromatograms for **Figure 3b**. (●) Glc (●) Gal (■) GlcNAc (■) GalNAc (▲) Fuc (◆) Neu5Ac

Figure S-3

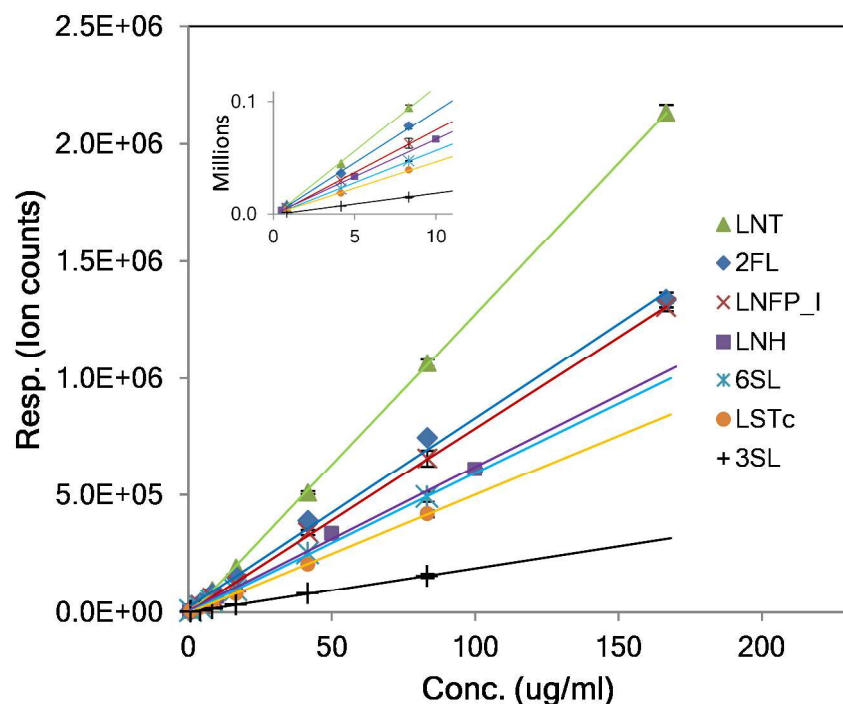

**Figure S-3:** The concentration studied here was from  $8.33 \times 10^{-1} \mu\text{g/mL}$  to  $1.67 \times 10^2 \mu\text{g/mL}$  for 2'-FL, LNFP-I, and LNT, from  $0.500 \mu\text{g/mL}$  to  $1.00 \times 10^2 \mu\text{g/mL}$  for LNH, from  $8.33 \times 10^{-1} \mu\text{g/mL}$  to  $8.33 \times 10^1 \mu\text{g/mL}$  for LSTc, 3'-SL and 6'-SL. Calibration curves for the seven HMO standards studied show a wide linear range over 2 orders of magnitude. The response of the HMO standards can be fitted to linear equations as follows: ( $\blacktriangle$ ) LNT,  $y = 12,880x - 14,067$ ,  $R^2 = 1.000$ ; ( $\blacklozenge$ ) 2'-FL,  $y = 8,082x + 20,297$ ,  $R^2 = 0.996$ ; ( $\times$ ) LNFP-I,  $y = 7,851x - 452$ ,  $R^2 = 1.000$ ; ( $\blacksquare$ ) LNH,  $y = 6,131x + 6,239$ ,  $R^2 = 0.998$ ; ( $*$ ) 6'-SL,  $y = 5,950x - 1,652$ ,  $R^2 = 1.000$ ; ( $\bullet$ ) LSTc,  $y = 5,041x - 3,586$ ,  $R^2 = 1.000$ ; ( $+$ ) 3'-SL,  $y = 1,881x - 184$ ,  $R^2 = 1.000$ . The slopes for the 7 HMOs studied are different by a factor of 2 except for 3'-SL. The repeatability of the instrument response was studied by injecting the same sample three times. The result shows a RSD <10% for concentrations at all levels.

Figure S-4

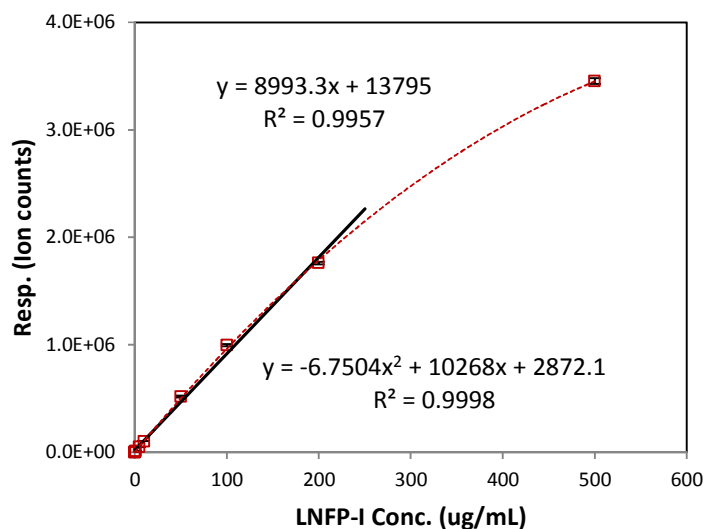

**Figure S-4:** Calibration curve of LNFP-I in nano pure water. The concentration of LNFP-I studied spanned from 0.001 $\mu\text{g}/\text{ml}$  to 500  $\mu\text{g}/\text{ml}$ . The red dash line was the polynomial fit from 0.001  $\mu\text{g}/\text{ml}$  to 500  $\mu\text{g}/\text{ml}$ . The fitted equation is  $y = -6.75x^2 + 10,268x + 2,872$ ,  $R^2 = 0.9998$ . The black line was the linear fit from 0.001  $\mu\text{g}/\text{ml}$  to 200  $\mu\text{g}/\text{ml}$ . The linear regression equation is  $y = 8993.3x - 13,795$ ,  $R^2 = 0.996$ .

## Reference

- (1) Ferris, A. M.; Jensen, R. G. *J. Pediatr. Gastroenterol. Nutr.* **1984**, *3*, 108-122.
- (2) Totten, S. M.; Zivkovic, A. M.; Wu, S.; Ngyuen, U.; Freeman, S. L.; Ruhaak, L. R.; Darboe, M. K.; German, J. B.; Prentice, A. M.; Lebrilla, C. B. *J. Proteome Res.* **2012**, *11*, 6124-6133.
